# Supplementary material for: SNTA1 gene rescues ion channel function and is antiarrhythmic in cardiomyocytes derived from induced pluripotent stem cells from muscular dystrophy patients
Source: eLife journal article supplement (doi:10.7554/elife.76576), 2022-06-08

Full unedited gel for  
Figure 5 - Figure  
supplement 4 - a

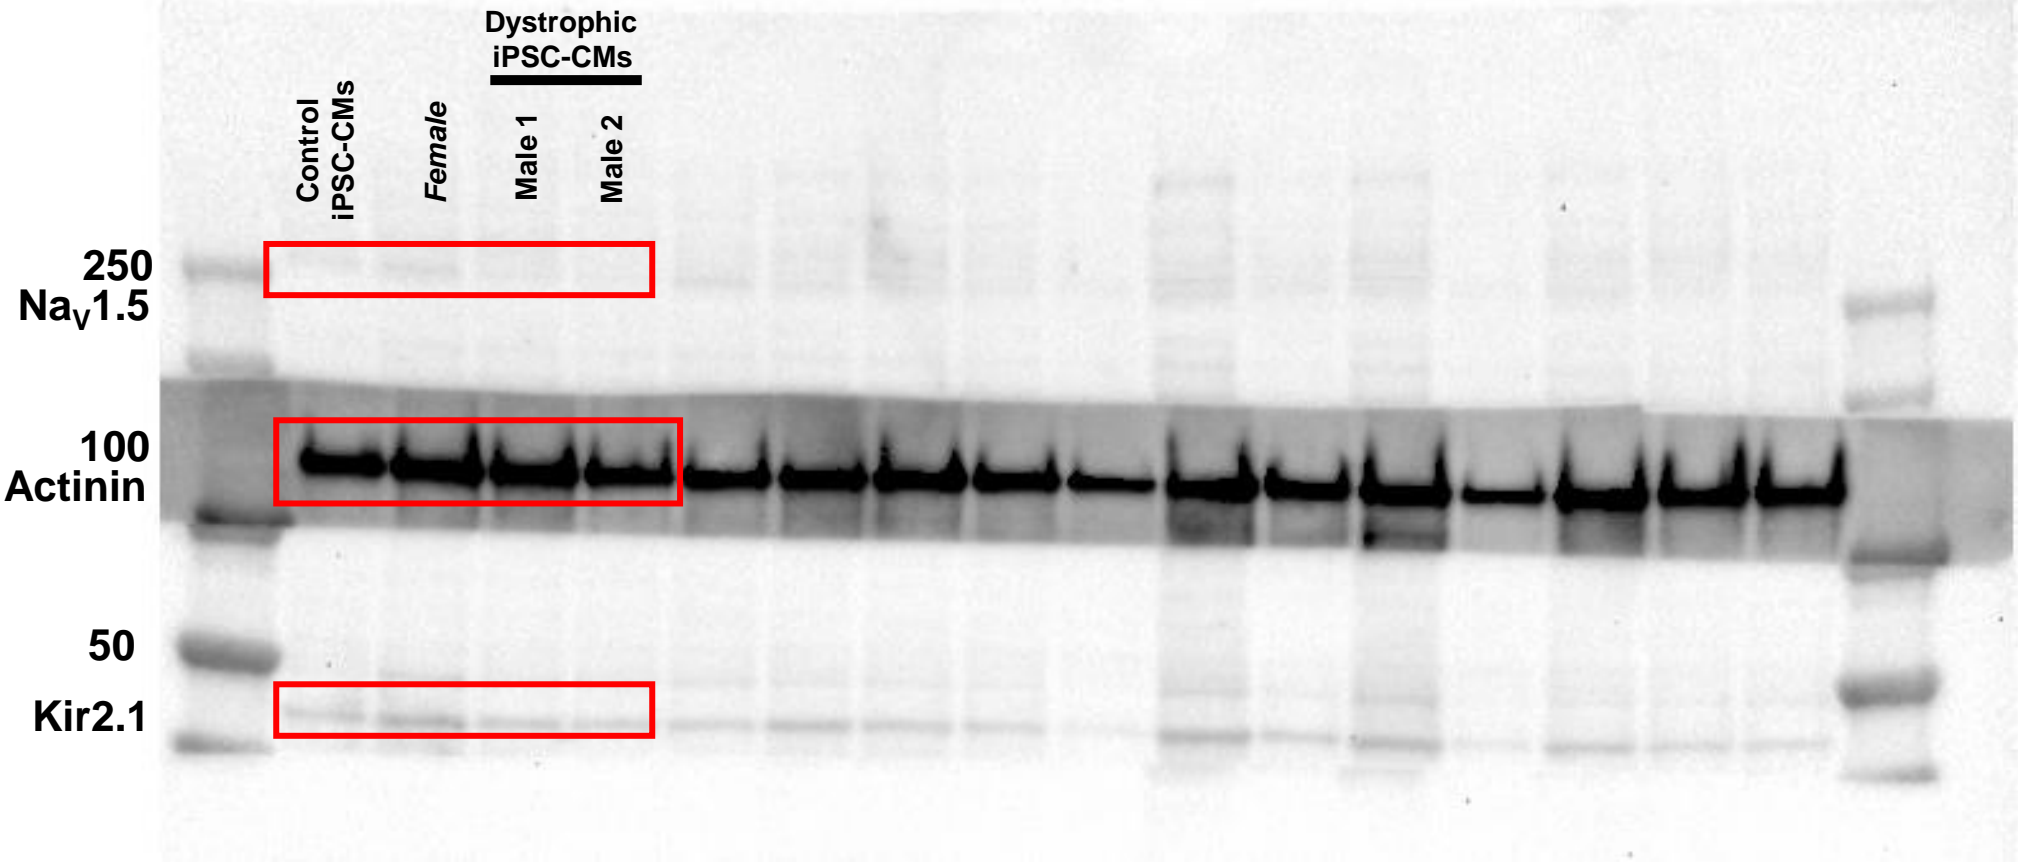

Full unedited gel for  
Figure 5 - Figure  
supplement 4 - c

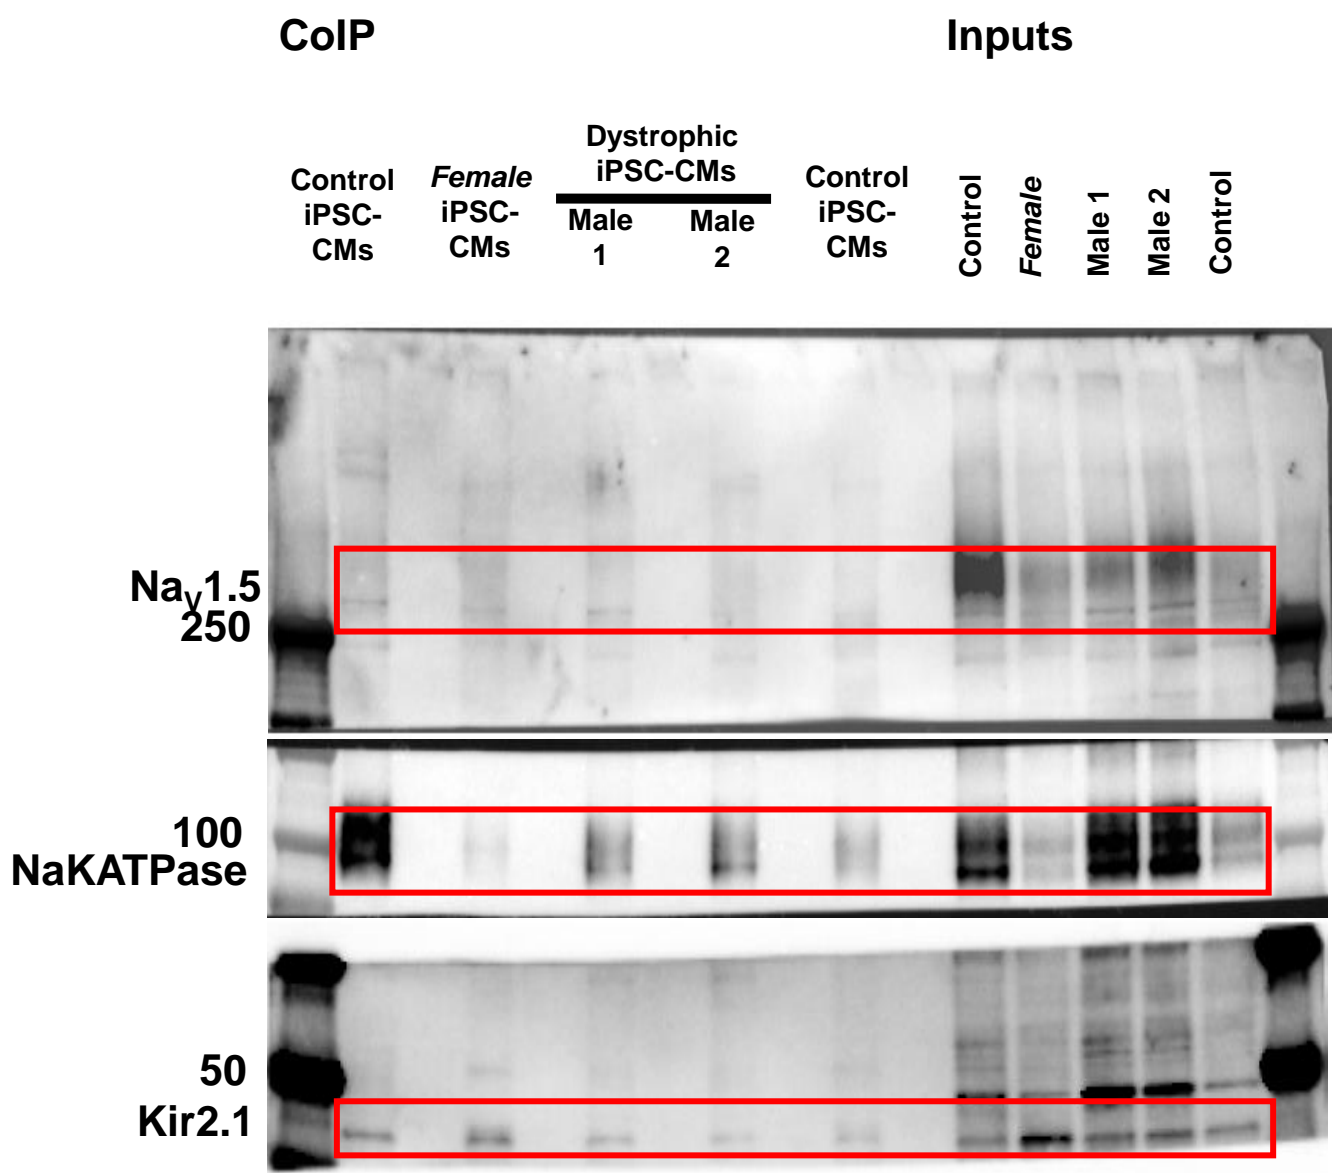

Supplement: fig5-figsupp4-data1 [file Figure 5-figure supplement 4-source data.pdf › Figure 5-figure supplement 4-source data 1/Figure 5-figure supplement 4-source data.pdf]
