# Supplementary figures and images for: SNTA1 gene rescues ion channel function and is antiarrhythmic in cardiomyocytes derived from induced pluripotent stem cells from muscular dystrophy patients
Source: eLife journal article supplement (doi:10.7554/elife.76576), 2022-06-08

Full unedited gel for  
Figure 2A

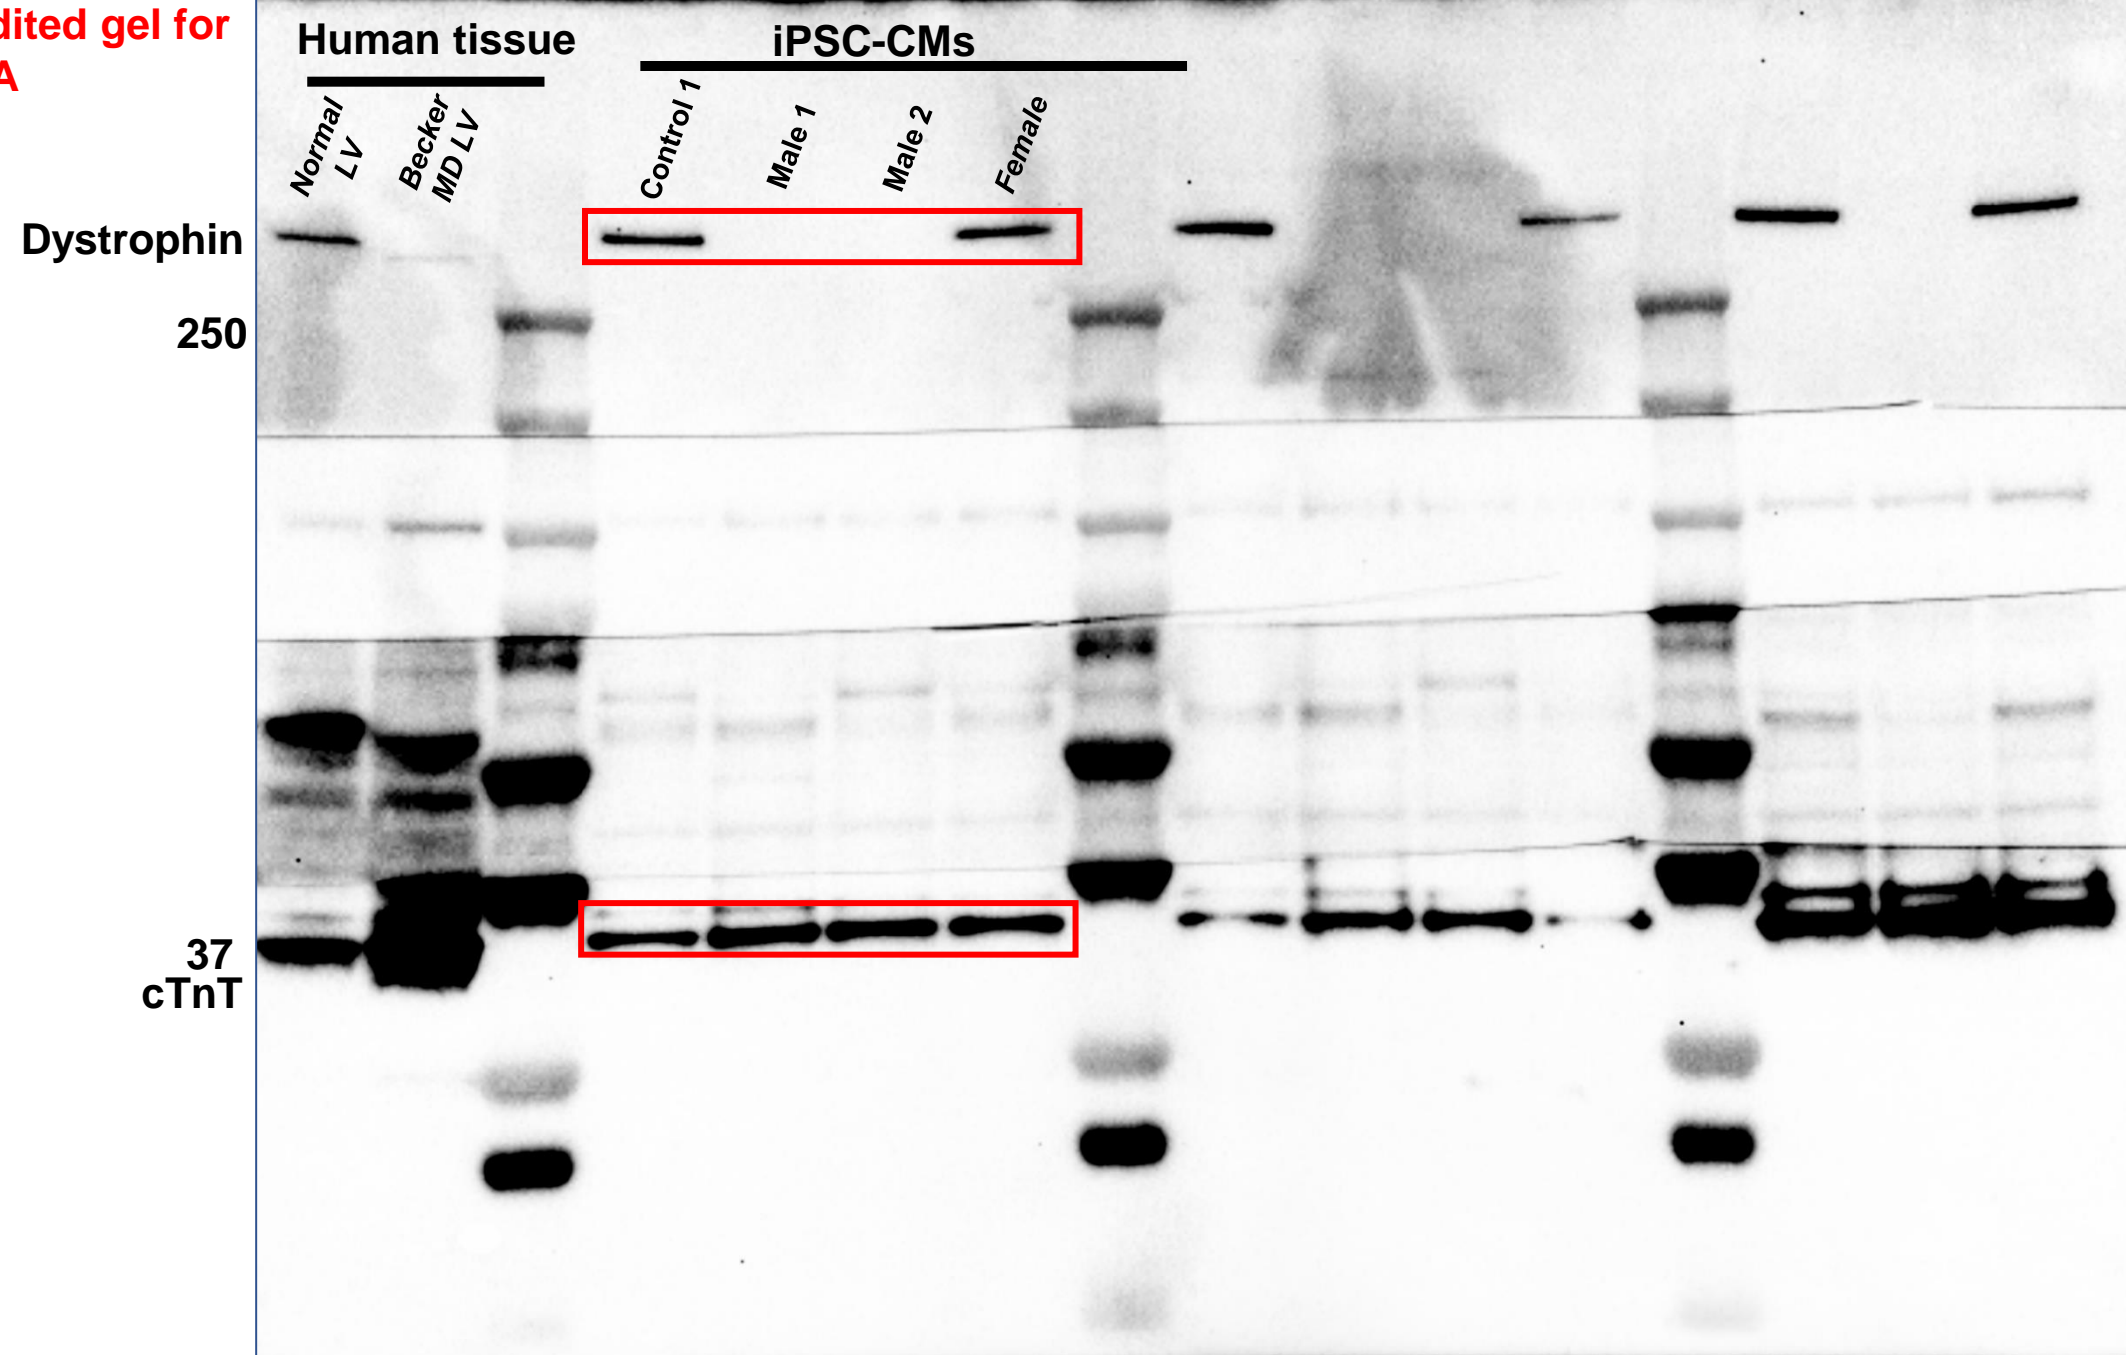

Supplement: fig2-data1 [file elife-76576-fig2-data1-v1.zip]

Full unedited gel for  
Supplementary  
Figure 4A

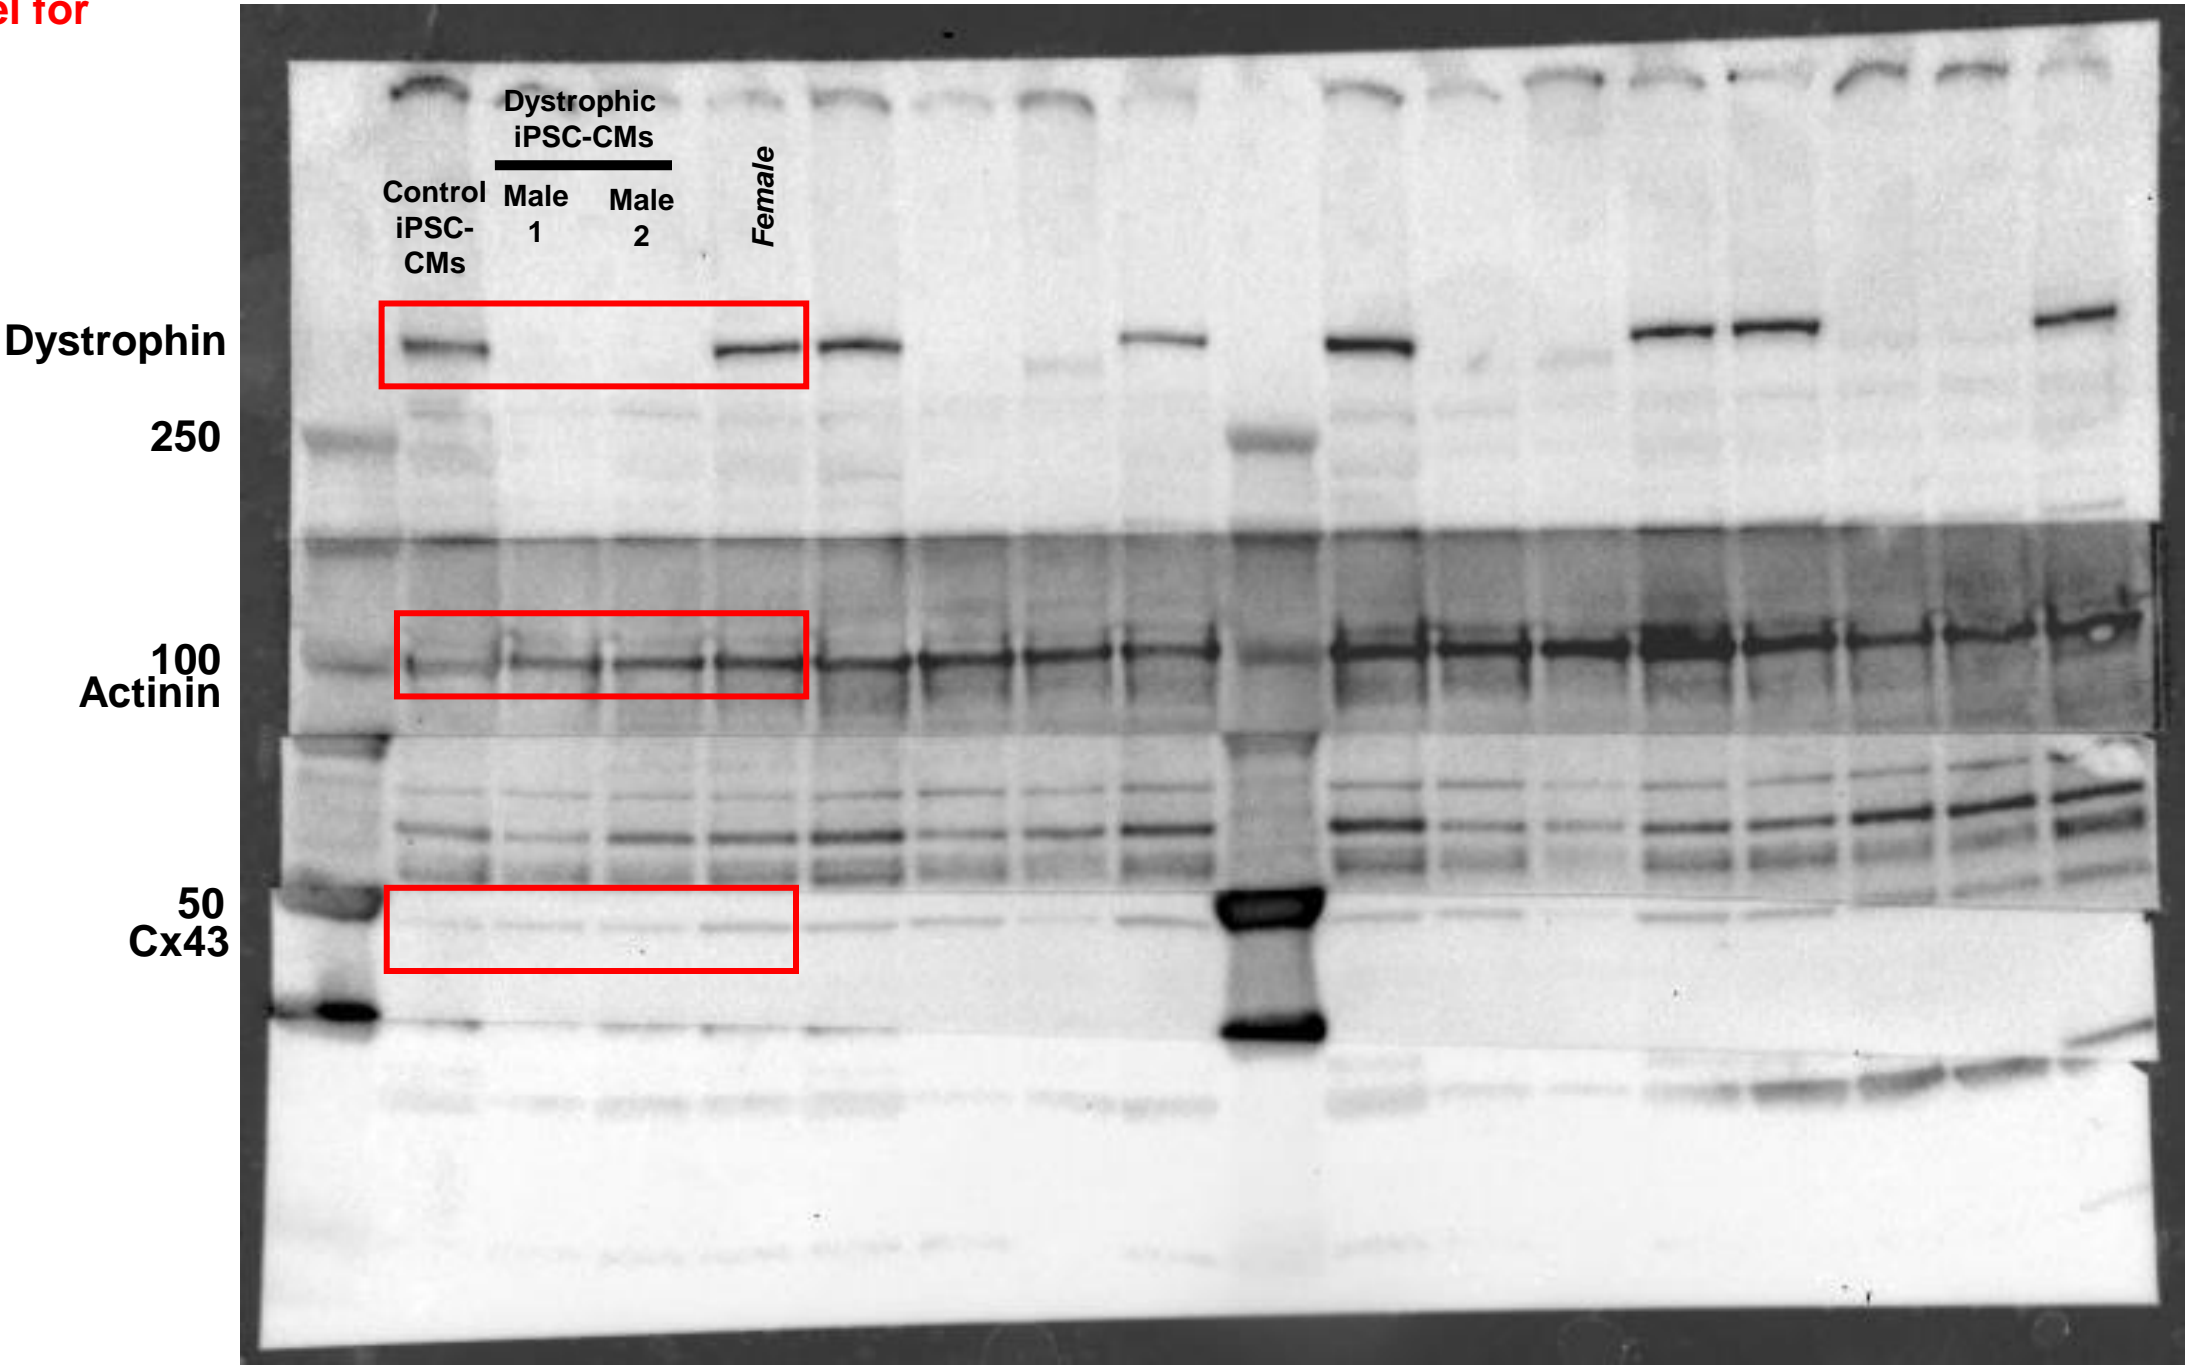

Supplement: fig4-figsupp2-data1 [file Supplemental Figure 4-source data 2. Unedited gel for Supplementary Figure 4A.pdf › Figure 4-figure supplement 2-source data 1/Supplemental Figure 4-source data 2. Unedited gel for Supplementary Figure 4A.pdf]
